# Supplementary material for: A correlative IR, MS, 1H, 13C and 15N NMR and theoretical study of 4-arylthiazol-2(3H)-onesElectronic supplementary information (ESI) available: NMR data, including graphs; Cartesian coordinates for 3a and 4. See http://www.rsc.org/suppdata/p2/b1/b106322g/
Source: Royal Society of Chemistry journal article supplement (doi:10.1039/b106322g), 2002-01-11
Supplement: b106322g_1.doc [file b106322g_1.doc]

# Supplementary data

## NMR

In 1H NMR experiments at 500 MHz the spectral width was 6000 Hz, number of scans 8, flip angle 30 and number of data points 65 K. The FIDs were multiplied by an exponential window function of the point resolution prior to FT. The 1H NMR chemical shifts were referenced to the trace signal of partly deuterated solvent CHD2 ( = 2.50 ppm from int. TMS).

In proton composite pulse decoupled 13C NMR experiments at 126 MHz the spectral width was 24000 Hz, number of scans varied between 32-100, flip angle 30 and number of data points 65 K. The FIDs were multiplied by an exponential window function of the point resolution prior to FT. The 13C NMR chemical shifts were referenced to the signal of DMSO-d6 ( = 39.50 ppm from int. TMS).

Typical parameters for inverse (proton detected) z-pulsed field gradient (z-PFG) Heteronuclear Multiple Quantum Coherence (1H,13C HMQC)21,22 spectra at 500.13/125.77 MHz were: 600 Hz/256 points (1H-axis) and 4400 Hz/256 points (13C-axis). A sine-bell window function was used along both axes prior to FT.

In inverse (proton detected) z-pulsed field gradient (z-PFG) Heteronuclear Multiple Bond Correlation (1H,13C HMBC)23 spectra at 500.13/ 125.77 MHz typical parameters were: 3200 Hz/512 points (1H-axis) and 20000 Hz/256 points (13C-axis). A sine-bell window function was used along both axes prior to FT. In order to eliminate HMQC-correlations in HMBC-spectra a low-pass filter was used and the delay for evolution of long-range couplings was 50 ms.

In inverse (proton detected) z-pulsed field gradient (z-PFG) Heteronuclear Multiple Bond Correlation (1H,15N HMBC) spectra at 250.13/ 25.35 MHz typical parameters were: 1000 Hz/1024 points (1H-axis) and 11000 Hz/512 points (15N-axis). A sine-bell window function was used along both axes prior to FT. In order to eliminate HMQC-correlations in HMBC-spectra a low-pass filter was used and the delay for evolution of long-range couplings was 100 ms. The 15N NMR chemical shifts are referenced to the signal of an external CH3NO2 in a 1-mm diameter capillary inserted coaxially inside the 5-mm diameter NMR-tube.
