# Supplementary figures and images for: A correlative IR, MS, 1H, 13C and 15N NMR and theoretical study of 4-arylthiazol-2(3H)-onesElectronic supplementary information (ESI) available: NMR data, including graphs; Cartesian coordinates for 3a and 4. See http://www.rsc.org/suppdata/p2/b1/b106322g/
Source: Royal Society of Chemistry journal article supplement (doi:10.1039/b106322g), 2002-01-11

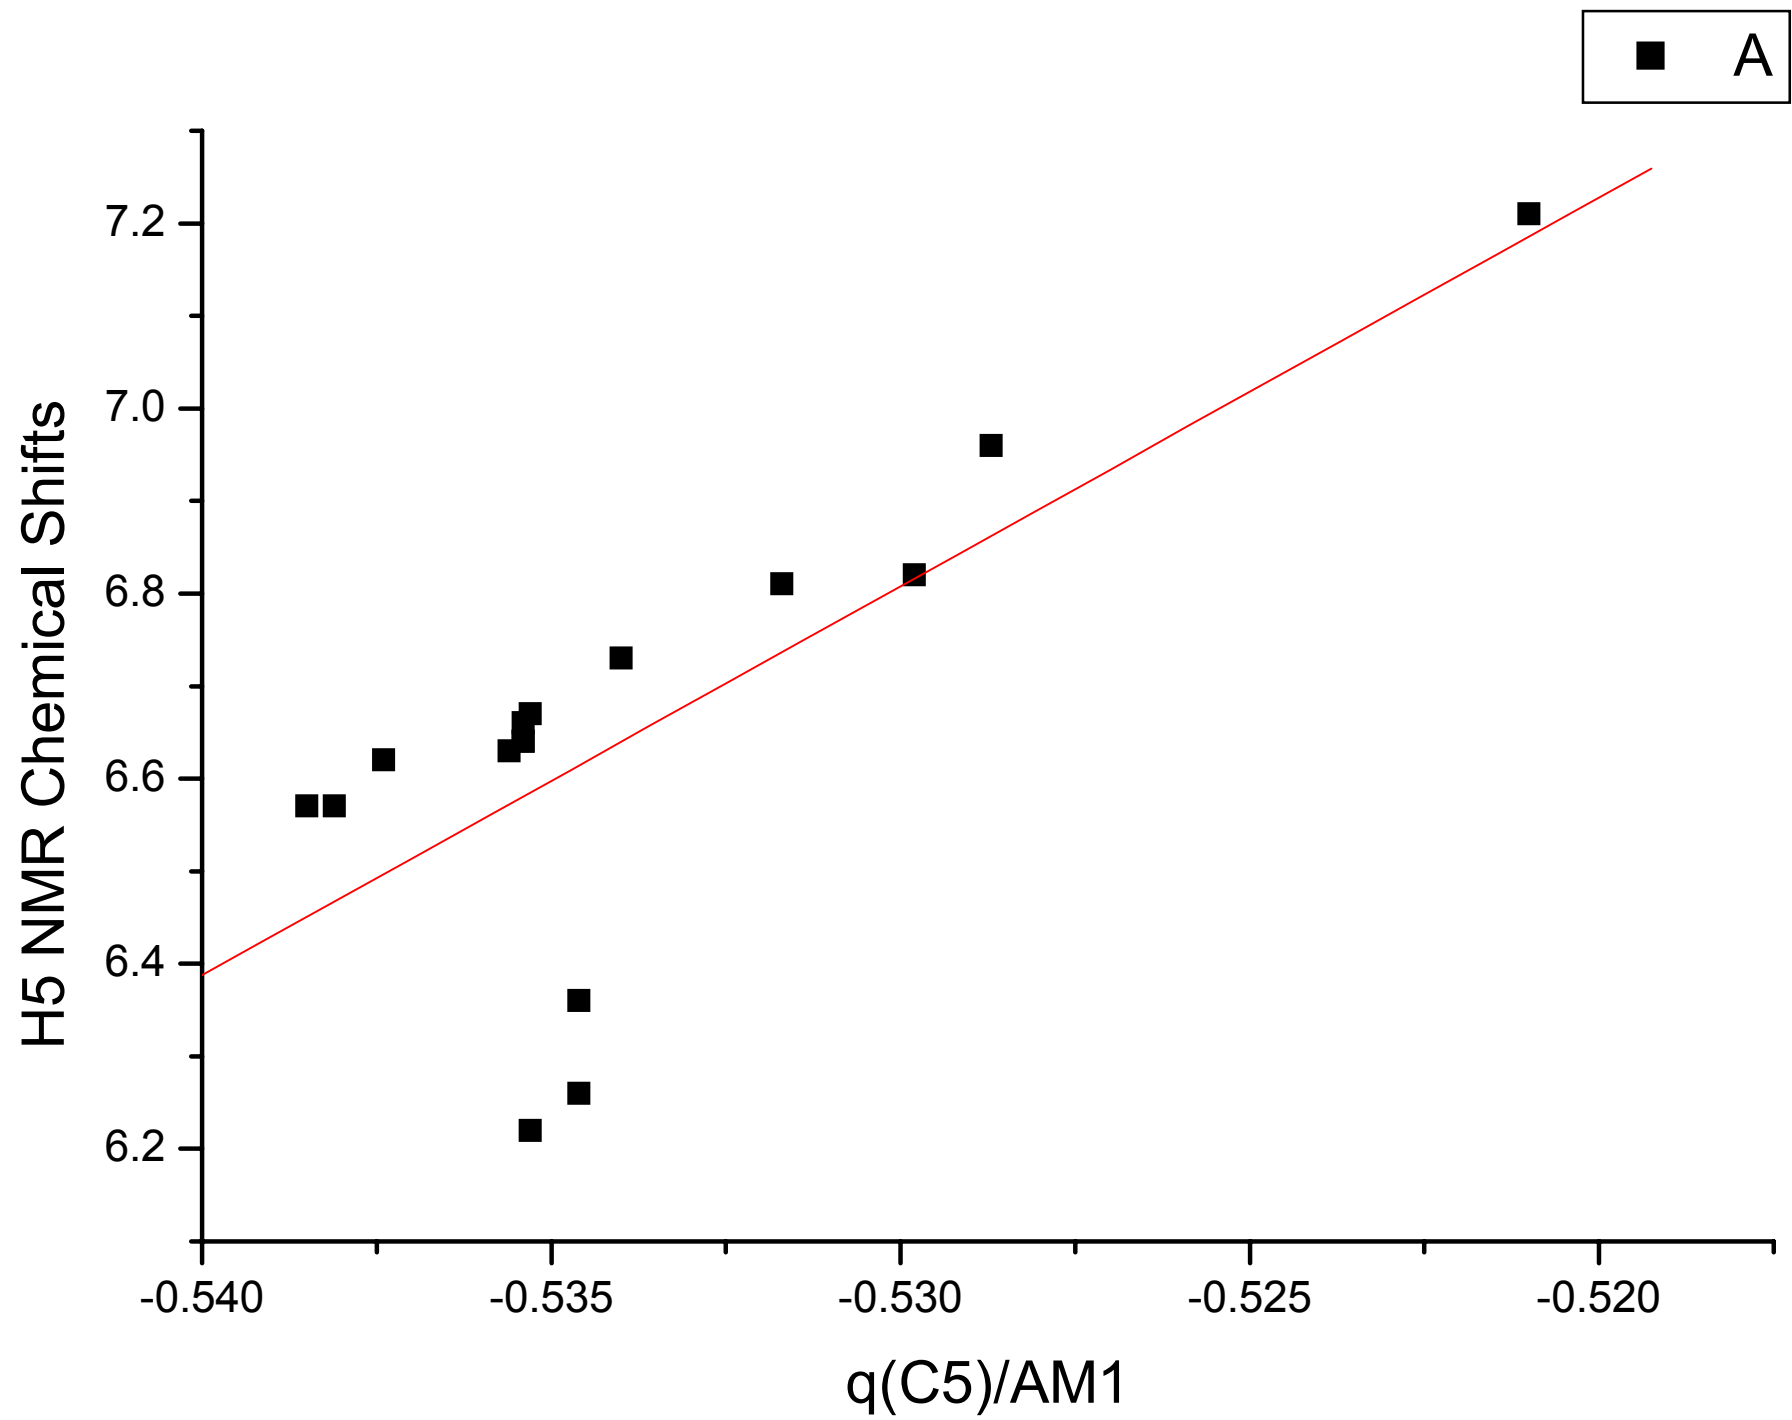

Supplement: b106322g_2.pdf [file b106322g_2.pdf]

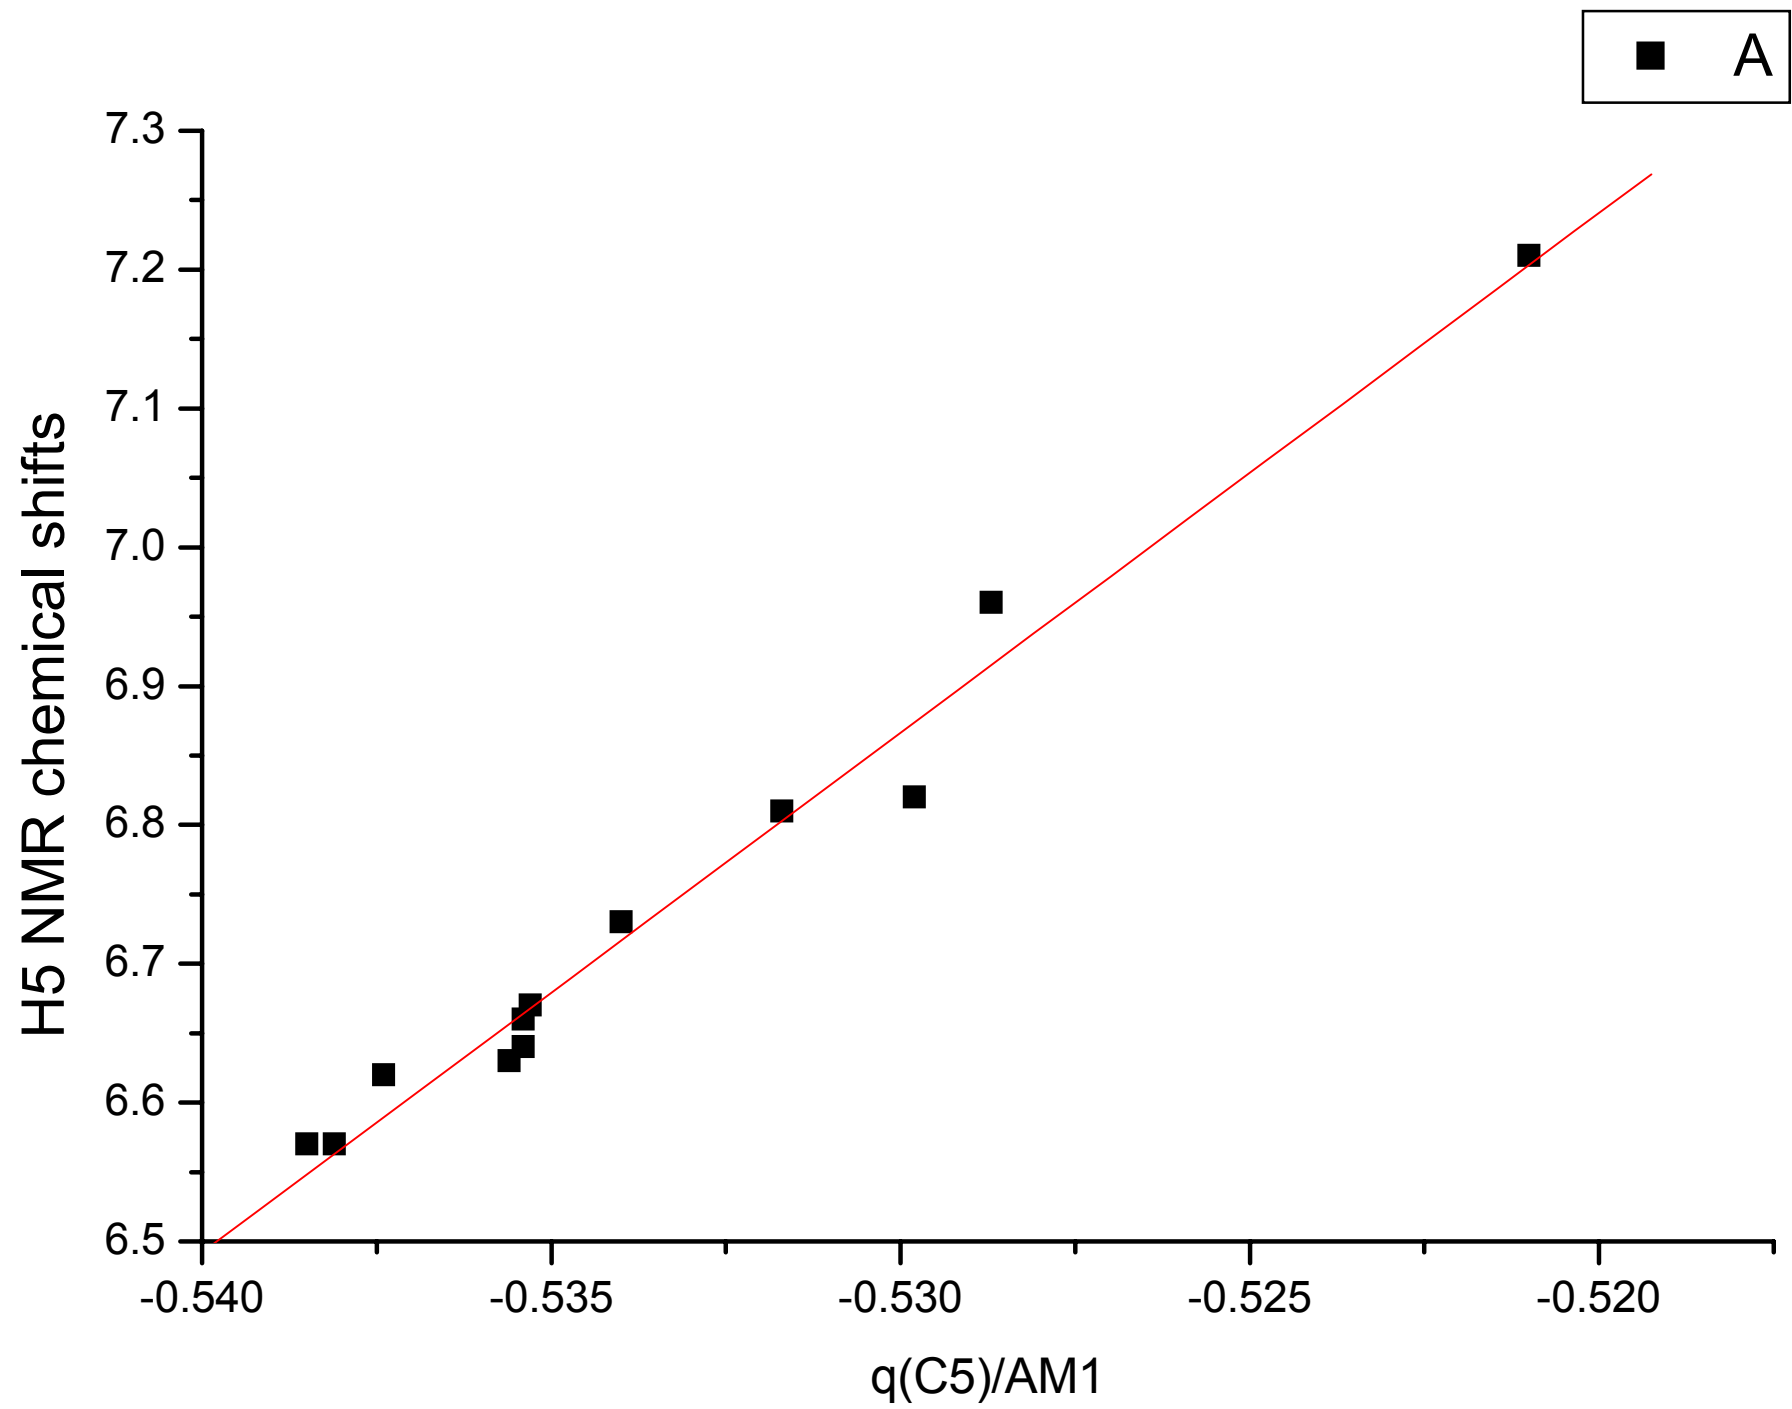

Supplement: b106322g_3.pdf [file b106322g_3.pdf]
